# Supplementary material for: Inclusion of Plasma Prolactin Levels in Current Risk Prediction Models of Premenopausal and Postmenopausal Breast Cancer
Source: PubMed Central journal article supplement — JNCI Cancer Spectr. 2018 Dec 4;2(4):pky055. doi: 10.1093/jncics/pky055 (PMC6649752; doi:10.1093/jncics/pky055), 2018-12-04
Supplement: pky055_supp.pdf [file pky055_supp.pdf]

## Inclusion of plasma prolactin levels in current risk prediction models of premenopausal and postmenopausal breast cancer

### Supplemental results

**Table S1.** Geometric mean of prolactin levels (ng/mL), multivariable linear regression estimates and *P*-values, for established risk factors for breast cancer in premenopausal cases and controls.

|                                                          | Premenopausal women<br>Cases |                                |                                | Premenopausal women<br>Controls  |     |                                | Difference<br>between<br>regression<br>coefficients<br><i>P</i> -value <sup>c</sup> |                                |                                  |
|----------------------------------------------------------|------------------------------|--------------------------------|--------------------------------|----------------------------------|-----|--------------------------------|-------------------------------------------------------------------------------------|--------------------------------|----------------------------------|
|                                                          | n                            | Geometric<br>mean <sup>a</sup> | Estimates<br>(SE) <sup>b</sup> | <i>P</i> -<br>value <sup>b</sup> | n   | Geometric<br>mean <sup>a</sup> |                                                                                     | Estimates<br>(SE) <sup>b</sup> | <i>P</i> -<br>value <sup>b</sup> |
| Age at blood draw, (y) <sup>d</sup>                      | 236                          |                                | 0.018 (0.009)                  | 0.053                            | 407 |                                | 0.004 (0.007)                                                                       | 0.500                          | 0.222                            |
| <47                                                      | 118                          | 16.5                           |                                |                                  | 187 | 14.7                           |                                                                                     |                                |                                  |
| ≥47                                                      | 118                          | 17.8                           |                                |                                  | 220 | 15.8                           |                                                                                     |                                |                                  |
| BMI at study entry,<br>(kg/m <sup>2</sup> ) <sup>e</sup> | 236                          |                                | 0.019 (0.011)                  | 0.078                            | 407 |                                | 0.003 (0.007)                                                                       | 0.714                          | 0.184                            |
| <25                                                      | 144                          | 16.4                           |                                |                                  | 243 | 15.0                           |                                                                                     |                                |                                  |
| 25-29                                                    | 69                           | 16.9                           |                                |                                  | 117 | 16.4                           |                                                                                     |                                |                                  |
| ≥30                                                      | 23                           | 23.2                           |                                |                                  | 47  | 14.3                           |                                                                                     |                                |                                  |
| Age at menarche, (y)                                     | 232                          |                                | 0.003 (0.029)                  | 0.919                            | 401 |                                | -0.030 (0.021)                                                                      | 0.155                          | 0.348                            |
| <13                                                      | 94                           | 17.8                           |                                |                                  | 142 | 15.1                           |                                                                                     |                                |                                  |
| 13                                                       | 66                           | 15.8                           |                                |                                  | 123 | 16.9                           |                                                                                     |                                |                                  |
| ≥14                                                      | 72                           | 17.5                           |                                |                                  | 136 | 14.2                           |                                                                                     |                                |                                  |
| Ever use of oral<br>contraceptives                       | 234                          |                                | -0.181 (0.141)                 | 0.202                            | 407 |                                | 0.107 (0.112)                                                                       | 0.341                          | 0.104                            |
| No                                                       | 22                           | 20.2                           |                                |                                  | 27  | 13.8                           |                                                                                     |                                |                                  |
| Yes                                                      | 212                          | 16.9                           |                                |                                  | 380 | 15.4                           |                                                                                     |                                |                                  |
| Number of pregnancies                                    | 233                          |                                | -0.040 (0.026)                 | 0.118                            | 406 |                                | -0.052 (0.017)                                                                      | <b>0.002</b>                   | 0.686                            |
| 0                                                        | 21                           | 19.0                           |                                |                                  | 38  | 21.1                           |                                                                                     |                                |                                  |
| 1                                                        | 18                           | 27.7                           |                                |                                  | 34  | 15.1                           |                                                                                     |                                |                                  |
| 2                                                        | 83                           | 17.5                           |                                |                                  | 128 | 15.1                           |                                                                                     |                                |                                  |
| ≥3                                                       | 111                          | 15.3                           |                                |                                  | 206 | 14.5                           |                                                                                     |                                |                                  |
| Parity                                                   | 233                          |                                | -0.180 (0.113)                 | 0.114                            | 406 |                                | -0.264 (0.078)                                                                      | <b>0.001</b>                   | 0.531                            |
| Nulliparous                                              | 35                           | 20.0                           |                                |                                  | 59  | 19.2                           |                                                                                     |                                |                                  |
| Parous                                                   | 198                          | 16.7                           |                                |                                  | 347 | 14.7                           |                                                                                     |                                |                                  |
| Number of births                                         | 233                          |                                | -0.145 (0.042)                 | <b>0.001</b>                     | 406 |                                | -0.091 (0.029)                                                                      | <b>0.002</b>                   | 0.279                            |
| Nulliparous                                              | 35                           | 20.0                           |                                |                                  | 59  | 19.2                           |                                                                                     |                                |                                  |
| 1                                                        | 31                           | 21.7                           |                                |                                  | 62  | 15.2                           |                                                                                     |                                |                                  |
| 2                                                        | 120                          | 17.1                           |                                |                                  | 190 | 14.9                           |                                                                                     |                                |                                  |
| ≥3                                                       | 47                           | 13.3                           |                                |                                  | 95  | 14.1                           |                                                                                     |                                |                                  |
| Age at first birth, (y)                                  | 198                          |                                | -0.015 (0.009)                 | 0.087                            | 347 |                                | 0.007 (0.006)                                                                       | 0.295                          | <b>0.038</b>                     |
| <25                                                      | 46                           | 17.6                           |                                |                                  | 71  | 14.0                           |                                                                                     |                                |                                  |
| 25-29                                                    | 70                           | 17.6                           |                                |                                  | 128 | 14.5                           |                                                                                     |                                |                                  |
| ≥30                                                      | 82                           | 15.5                           |                                |                                  | 148 | 15.3                           |                                                                                     |                                |                                  |
| Minimum duration of<br>breastfeeding, (m)                | 185                          |                                | -0.012 (0.005)                 | <b>0.015</b>                     | 316 |                                | -0.002 (0.003)                                                                      | 0.558                          | 0.063                            |

**Inclusion of plasma prolactin levels in current risk prediction models of premenopausal and postmenopausal breast cancer**

|                                   |     |      |                |       |      |      |                |              |       |
|-----------------------------------|-----|------|----------------|-------|------|------|----------------|--------------|-------|
| Never (parous)                    | 0   |      |                | 3     | 13.4 |      |                |              |       |
| <18                               | 85  | 18.4 |                | 132   | 15.7 |      |                |              |       |
| ≥18                               | 100 | 15.0 |                | 181   | 14.4 |      |                |              |       |
| Ever use of HRT                   | 229 |      | -0.017 (0.143) | 0.902 | 401  |      | -0.168 (0.092) | 0.068        | 0.360 |
| No                                | 208 | 17.1 |                |       | 359  | 15.6 |                |              |       |
| Yes                               | 21  | 16.8 |                |       | 42   | 13.2 |                |              |       |
| Alcohol consumption, (g/week)     | 232 |      | 0.000 (0.001)  | 0.788 | 405  |      | 0.000 (0.001)  | 0.332        | 0.772 |
| <5                                | 44  | 17.5 |                |       | 81   | 15.6 |                |              |       |
| 5-14                              | 25  | 15.8 |                |       | 56   | 14.4 |                |              |       |
| ≥15                               | 163 | 17.3 |                |       | 268  | 15.4 |                |              |       |
| Smoking status                    | 230 |      | -0.064 (0.057) | 0.264 | 406  |      | -0.105 (0.040) | <b>0.009</b> | 0.538 |
| Never smoked                      | 115 | 17.3 |                |       | 226  | 16.1 |                |              |       |
| Past smoker                       | 81  | 18.4 |                |       | 134  | 14.8 |                |              |       |
| Current smoker                    | 34  | 14.1 |                |       | 46   | 12.9 |                |              |       |
| History of benign breast disorder | 226 |      | -0.054 (0.095) | 0.569 | 401  |      | 0.001 (0.073)  | 0.991        | 0.637 |
| No                                | 163 | 17.5 |                |       | 328  | 15.4 |                |              |       |
| Yes                               | 63  | 16.6 |                |       | 73   | 15.4 |                |              |       |
| Family history of breast cancer   | 228 |      | 0.096 (0.096)  | 0.319 | 394  |      | -0.078 (0.080) | 0.332        | 0.157 |
| No                                | 172 | 16.7 |                |       | 337  | 15.4 |                |              |       |
| Yes                               | 56  | 18.4 |                |       | 57   | 14.2 |                |              |       |
| Family history of ovarian cancer  | 225 |      | 0.084 (0.192)  | 0.661 | 382  |      | 0.276 (0.157)  | 0.080        | 0.430 |
| No                                | 214 | 17.0 |                |       | 369  | 15.2 |                |              |       |
| Yes                               | 11  | 18.5 |                |       | 13   | 20.0 |                |              |       |

Abbreviations: BMI, body mass index; HRT, hormone replacement therapy; SE, standards error.

<sup>a</sup> Adjusted for age and BMI at blood draw.

<sup>b</sup> Based on independent variables (continuous) adjusted for age and BMI and natural log-transformed prolactin (ng/mL) (continuous) as dependent variable.

<sup>c</sup> Test of difference by Wald statistic.

<sup>d</sup> Adjusted for BMI at blood draw.

<sup>e</sup> Adjusted for age at blood draw.

## Inclusion of plasma prolactin levels in current risk prediction models of premenopausal and postmenopausal breast cancer

**Table S2.** Geometric mean of prolactin levels (ng/mL), multivariable linear regression estimates and *P*-values, for established risk factors for breast cancer in postmenopausal cases and controls.

|                                                          | Postmenopausal women<br>Cases |                                |                                | Postmenopausal women<br>Controls |     |                                | Difference<br>between<br>regression<br>coefficients<br><i>P</i> -value <sup>c</sup> |                                |                                  |
|----------------------------------------------------------|-------------------------------|--------------------------------|--------------------------------|----------------------------------|-----|--------------------------------|-------------------------------------------------------------------------------------|--------------------------------|----------------------------------|
|                                                          | n                             | Geometric<br>mean <sup>a</sup> | Estimates<br>(SE) <sup>b</sup> | <i>P</i> -<br>value <sup>b</sup> | n   | Geometric<br>mean <sup>a</sup> |                                                                                     | Estimates<br>(SE) <sup>b</sup> | <i>P</i> -<br>value <sup>b</sup> |
| Age at blood draw, (y) <sup>d</sup>                      | 482                           |                                | -0.008 (0.004)                 | <b>0.042</b>                     | 977 |                                | -0.006 (0.003)                                                                      | <b>0.034</b>                   | 0.626                            |
| >64                                                      | 206                           | 11.9                           |                                |                                  | 402 | 11.8                           |                                                                                     |                                |                                  |
| ≥64                                                      | 276                           | 11.0                           |                                |                                  | 575 | 10.9                           |                                                                                     |                                |                                  |
| BMI at study entry,<br>(kg/m <sup>2</sup> ) <sup>e</sup> | 482                           |                                | -0.005 (0.006)                 | 0.355                            | 977 |                                | 0.001 (0.004)                                                                       | 0.775                          | 0.362                            |
| <25                                                      | 219                           | 12.1                           |                                |                                  | 482 | 11.2                           |                                                                                     |                                |                                  |
| 25-29                                                    | 179                           | 10.7                           |                                |                                  | 363 | 11.4                           |                                                                                     |                                |                                  |
| ≥30.0                                                    | 84                            | 11.0                           |                                |                                  | 132 | 11.1                           |                                                                                     |                                |                                  |
| Age at menarche, (y)                                     | 471                           |                                | 0.023 (0.018)                  | 0.194                            | 953 |                                | -0.021 (0.012)                                                                      | 0.091                          | <b>0.045</b>                     |
| <13                                                      | 150                           | 11.2                           |                                |                                  | 290 | 11.7                           |                                                                                     |                                |                                  |
| 13                                                       | 134                           | 10.5                           |                                |                                  | 250 | 11.6                           |                                                                                     |                                |                                  |
| ≥14                                                      | 187                           | 12.1                           |                                |                                  | 413 | 10.9                           |                                                                                     |                                |                                  |
| Ever use of oral<br>contraceptives                       | 467                           |                                | -0.025 (0.061)                 | 0.675                            | 958 |                                | -0.029 (0.045)                                                                      | 0.517                          | 0.963                            |
| No                                                       | 117                           | 11.6                           |                                |                                  | 210 | 11.6                           |                                                                                     |                                |                                  |
| Yes                                                      | 350                           | 11.3                           |                                |                                  | 748 | 11.2                           |                                                                                     |                                |                                  |
| Number of pregnancies                                    | 473                           |                                | -0.013 (0.017)                 | 0.466                            | 976 |                                | -0.010 (0.012)                                                                      | 0.406                          | 0.911                            |
| 0                                                        | 41                            | 11.6                           |                                |                                  | 74  | 11.9                           |                                                                                     |                                |                                  |
| 1                                                        | 58                            | 10.9                           |                                |                                  | 106 | 11.6                           |                                                                                     |                                |                                  |
| 2                                                        | 176                           | 11.2                           |                                |                                  | 333 | 11.2                           |                                                                                     |                                |                                  |
| ≥3                                                       | 198                           | 11.5                           |                                |                                  | 463 | 11.1                           |                                                                                     |                                |                                  |
| Parity                                                   | 473                           |                                | -0.022 (0.079)                 | 0.776                            | 976 |                                | -0.093 (0.058)                                                                      | 0.113                          | 0.476                            |
| Nulliparous                                              | 57                            | 11.6                           |                                |                                  | 103 | 12.3                           |                                                                                     |                                |                                  |
| Parous                                                   | 416                           | 11.3                           |                                |                                  | 873 | 11.2                           |                                                                                     |                                |                                  |
| Number of births                                         | 473                           |                                | -0.015 (0.028)                 | 0.600                            | 976 |                                | -0.016 (0.020)                                                                      | 0.402                          | 0.959                            |
| Nulliparous                                              | 57                            | 11.6                           |                                |                                  | 103 | 12.3                           |                                                                                     |                                |                                  |
| 1                                                        | 81                            | 12.0                           |                                |                                  | 155 | 11.5                           |                                                                                     |                                |                                  |
| 2                                                        | 228                           | 11.0                           |                                |                                  | 454 | 10.8                           |                                                                                     |                                |                                  |
| ≥3                                                       | 107                           | 11.5                           |                                |                                  | 264 | 11.6                           |                                                                                     |                                |                                  |
| Age at first birth, (y)                                  | 416                           |                                | 0.005 (0.006)                  | 0.329                            | 873 |                                | 0.004 (0.004)                                                                       | 0.338                          | 0.810                            |
| <25                                                      | 171                           | 10.8                           |                                |                                  | 380 | 11.3                           |                                                                                     |                                |                                  |
| 25-29                                                    | 158                           | 11.9                           |                                |                                  | 335 | 10.9                           |                                                                                     |                                |                                  |
| ≥30                                                      | 87                            | 11.3                           |                                |                                  | 158 | 11.5                           |                                                                                     |                                |                                  |
| Minimum duration of<br>breastfeeding, (m)                | 399                           |                                | -0.003 (0.003)                 | 0.355                            | 840 |                                | -0.001 (0.002)                                                                      | 0.438                          | 0.737                            |
| Never (parous)                                           | 19                            | 12.2                           |                                |                                  | 28  | 11.4                           |                                                                                     |                                |                                  |
| <18                                                      | 237                           | 11.1                           |                                |                                  | 480 | 11.1                           |                                                                                     |                                |                                  |

### Inclusion of plasma prolactin levels in current risk prediction models of premenopausal and postmenopausal breast cancer

|                                   |     |      |                |       |     |      |                |       |       |
|-----------------------------------|-----|------|----------------|-------|-----|------|----------------|-------|-------|
| ≥18                               | 143 | 11.2 |                |       | 332 | 11.2 |                |       |       |
| Age at menopause                  | 263 |      | 0.000 (0.007)  | 0.998 | 500 |      | -0.005 (0.005) | 0.292 | 0.558 |
| <50                               | 106 | 11.9 |                |       | 201 | 12.2 |                |       |       |
| 50-54                             | 110 | 11.3 |                |       | 245 | 11.9 |                |       |       |
| ≥55                               | 266 | 11.2 |                |       | 531 | 10.7 |                |       |       |
| Ever use of HRT                   | 475 |      | 0.036 (0.052)  | 0.483 | 970 |      | 0.058 (0.036)  | 0.110 | 0.731 |
| No                                | 241 | 11.2 |                |       | 527 | 11.0 |                |       |       |
| Yes                               | 234 | 11.6 |                |       | 443 | 11.6 |                |       |       |
| Alcohol consumption, (g/week)     | 473 |      | 0.000 (0.000)  | 0.564 | 970 |      | 0.000 (0.000)  | 0.451 | 0.356 |
| <5                                | 83  | 12.4 |                |       | 201 | 11.2 |                |       |       |
| 5-14                              | 56  | 10.4 |                |       | 148 | 10.8 |                |       |       |
| ≥15                               | 334 | 11.3 |                |       | 621 | 11.4 |                |       |       |
| Smoking status                    | 472 |      | -0.041 (0.037) | 0.271 | 974 |      | -0.049 (0.026) | 0.062 | 0.850 |
| Never smoked                      | 180 | 11.9 |                |       | 429 | 11.6 |                |       |       |
| Past smoker                       | 217 | 11.0 |                |       | 420 | 11.3 |                |       |       |
| Current smoker                    | 75  | 11.2 |                |       | 125 | 10.2 |                |       |       |
| History of benign breast disorder | 465 |      | -0.009 (0.056) | 0.867 | 960 |      | -0.014 (0.043) | 0.744 | 0.948 |
| No                                | 319 | 11.4 |                |       | 733 | 11.4 |                |       |       |
| Yes                               | 146 | 11.3 |                |       | 227 | 11.2 |                |       |       |
| Family history of breast cancer   | 470 |      | -0.040 (0.060) | 0.503 | 949 |      | -0.040 (0.048) | 0.397 | 0.999 |
| No                                | 352 | 11.5 |                |       | 782 | 11.3 |                |       |       |
| Yes                               | 118 | 11.0 |                |       | 167 | 10.9 |                |       |       |
| Family history of ovarian cancer  | 455 |      | 0.161 (0.121)  | 0.181 | 930 |      | -0.018 (0.091) | 0.845 | 0.237 |
| No                                | 433 | 11.2 |                |       | 890 | 11.3 |                |       |       |
| Yes                               | 22  | 13.1 |                |       | 40  | 11.1 |                |       |       |

Abbreviations: BMI, body mass index; HRT, hormone replacement therapy; SE, standards error.

<sup>a</sup> Adjusted for age and BMI at blood draw.

<sup>b</sup> Based on independent variables (continuous) adjusted for age and BMI and natural log-transformed prolactin (ng/mL) (continuous) as dependent variable.

<sup>c</sup> Test of difference by Wald statistic.

<sup>d</sup> Adjusted for BMI at blood draw.

<sup>e</sup> Adjusted for age at blood draw.

## Inclusion of plasma prolactin levels in current risk prediction models of premenopausal and postmenopausal breast cancer

**Table S3.** Multivariable adjusted odds ratios, comparing top and bottom quintals, for risk of breast cancer as a function of tumour characteristics, for pre- and postmenopausal women.

| Case group     | Premenopausal women <sup>a</sup> |       |                |                                       | Postmenopausal women <sup>b</sup> |       |                |                                       |
|----------------|----------------------------------|-------|----------------|---------------------------------------|-----------------------------------|-------|----------------|---------------------------------------|
|                | <i>n</i> cases/<br>controls      | OR    | 95% CI         | <i>P</i> -value<br>trend <sup>c</sup> | <i>n</i> cases/<br>controls       | OR    | 95% CI         | <i>P</i> -value<br>trend <sup>c</sup> |
| Diagnose <2 yr | 175/381                          | 2.211 | 1.221 to 4.004 | <b>0.003</b>                          | 274/904                           | 1.179 | 0.735 to 1.891 | 0.821                                 |
| Diagnose ≥2 yr | 36/381                           | 0.936 | 0.344 to 3.188 | 0.719                                 | 163/904                           | 0.782 | 0.550 to 1.567 | 0.896                                 |
| ER+ cases      | 163/381                          | 1.926 | 1.065 to 3.483 | <b>0.016</b>                          | 335/904                           | 1.059 | 0.693 to 1.618 | 0.778                                 |
| PR+ cases      | 148/381                          | 1.752 | 0.941 to 3.261 | <b>0.046</b>                          | 268/904                           | 0.928 | 0.587 to 1.465 | 0.981                                 |
| Tumour <20mm   | 159/381                          | 2.124 | 1.149 to 3.927 | <b>0.001</b>                          | 332/904                           | 0.978 | 0.640 to 1.493 | 0.716                                 |
| Tumour ≥20mm   | 52/381                           | 1.412 | 0.552 to 3.611 | 0.753                                 | 102/904                           | 1.361 | 0.689 to 2.690 | 0.386                                 |
| Invasive cases | 172/381                          | 2.099 | 1.154 to 3.820 | <b>0.010</b>                          | 368/904                           | 1.027 | 0.686 to 1.537 | 0.991                                 |

\* ORs comparing median hormone levels (ng/mL) in top quintile to median level in bottom quintile.

<sup>a</sup> Adjusted for age and BMI at blood draw, benign breast disorder (no, yes), breast cancer in family (no, yes), smoking status (never, previous, or current smoker), age at menarche and number of births (0, 1, 2 or ≥3).

<sup>b</sup> Adjusted for age and BMI at blood draw, benign breast disorder (no, yes), breast cancer in family (no, yes), smoking status (never, previous, or current smoker), age at menarche, number of births (0, 1, 2 or ≥3), and ever use of hormone replacement therapy.

<sup>c</sup> *P*-value based on Wald test on natural log-transformed prolactin (ng/mL), continuous.
